# Supplementary material
Source: publisher figshare collection journal article supplement (https://sage.figshare.com/ndownloader/files/14802170)
Supplement: Supplementary file 1 [file 14802170]

## Supplementary Tables

Table S1: The number and proportion of images (out of the total no. of 116 images) that had each of the 12 features based on participants rating (standardized score > 0)

| Feature                  | No. of Images | % out of Total |
|--------------------------|---------------|----------------|
| Eyes                     | 76            | 66%            |
| Mouth                    | 74            | 64%            |
| Nose                     | 38            | 33%            |
| Forehead                 | 50            | 43%            |
| Teeth                    | 33            | 28%            |
| Ears                     | 24            | 21%            |
| Eyebrows                 | 36            | 31%            |
| Hair                     | 36            | 31%            |
| Frame                    | 66            | 57%            |
| Proportion               | 61            | 53%            |
| Symmetry                 | 59            | 51%            |
| Emotional Expressiveness | 69            | 59%            |
| <b>Faceness</b>          | <b>74</b>     | <b>64%</b>     |

Table S2: The number and proportion of images out of the total no. of 74 images that were perceived as faces (standardized faceness score > 0) that had each of the 12 features based on participants rating (standardized feature score > 0)

| Feature                  | No. of Images | % out of Face Images |
|--------------------------|---------------|----------------------|
| Eyes                     | 68            | 92%                  |
| Mouth                    | 68            | 92%                  |
| Nose                     | 34            | 46%                  |
| Forehead                 | 47            | 64%                  |
| Teeth                    | 28            | 38%                  |
| Ears                     | 22            | 30%                  |
| Eyebrows                 | 33            | 45%                  |
| Hair                     | 31            | 42%                  |
| Frame                    | 57            | 77%                  |
| Proportion               | 59            | 80%                  |
| Symmetry                 | 53            | 72%                  |
| Emotional Expressiveness | 67            | 91%                  |
| <b>Faceness</b>          | <b>74</b>     | <b>100%</b>          |

Table S3: Regression model which includes the number of features as a predictor together with the 12 features (sorted by t-value).

|                               | B           | Std.<br>Error | Beta        | t           | Sig.         |
|-------------------------------|-------------|---------------|-------------|-------------|--------------|
| Eyes                          | 0.48        | 0.07          | 0.48        | 6.74        | < .001       |
| Mouth                         | 0.25        | 0.09          | 0.25        | 2.88        | 0.005        |
| Eyebrows                      | 0.11        | 0.05          | 0.08        | 2.03        | 0.045        |
| Hair                          | 0.08        | 0.04          | 0.07        | 1.83        | 0.070        |
| Emotional<br>expressiveness   | 0.12        | 0.09          | 0.10        | 1.28        | 0.205        |
| <i>Number of<br/>features</i> | <i>0.03</i> | <i>0.02</i>   | <i>0.13</i> | <i>1.21</i> | <i>0.228</i> |
| Nose                          | 0.03        | 0.04          | 0.03        | 0.71        | 0.481        |
| Proportion                    | 0.07        | 0.13          | 0.05        | 0.55        | 0.586        |
| Forehead                      | 0.01        | 0.07          | 0.01        | 0.13        | 0.898        |
| Frame                         | -0.01       | 0.07          | -0.01       | -0.16       | 0.873        |
| Teeth                         | -0.02       | 0.04          | -0.02       | -0.50       | 0.622        |
| Symmetry                      | -0.06       | 0.08          | -0.04       | -0.76       | 0.451        |
| Ears                          | -0.08       | 0.04          | -0.07       | -1.78       | 0.079        |
